# Supplementary material
Source: Research Square preprint supplement (doi:10.21203/rs.3.rs-9303225/v1)
Supplement: Supplementary file 1 [file 40d7585cb039926ae6ef9540.pdf]

1 **EXTENDED DATA FIGURES**

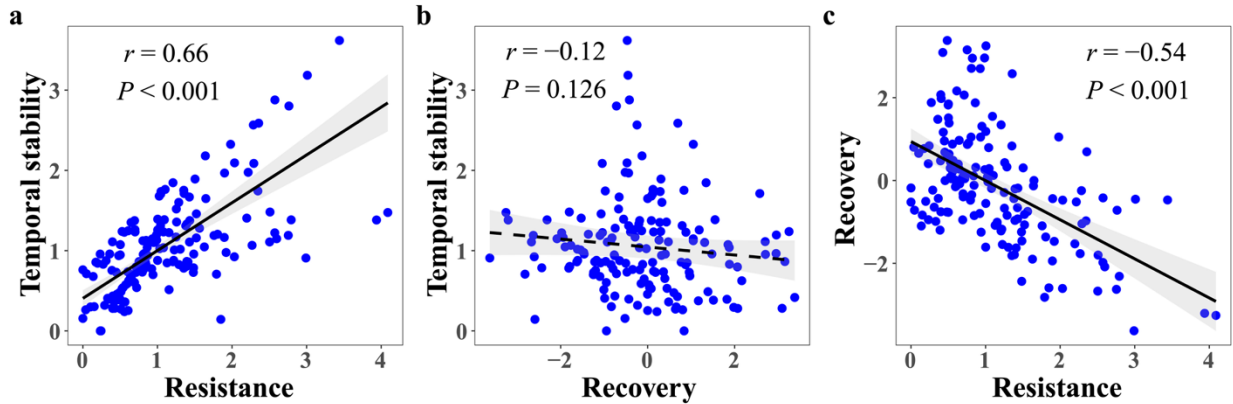

2

3 **Extended Data Figure 1** | Relationships between different dimensions of ecosystem stability. (a)

4 Temporal stability and resistance, (b) temporal stability and recovery, (c) resistance and recovery.

5 Temporal stability, resistance, and recovery are log-transformed. Lines show mixed-effects

6 model fits (solid for  $P < 0.05$ ; dotted for  $P \geq 0.05$ ). Shaded areas represent 95% confidence

7 intervals. Correlation coefficient ( $r$ ) are shown in each panel. Sample size (N) equals to 159 in all

8 panels.

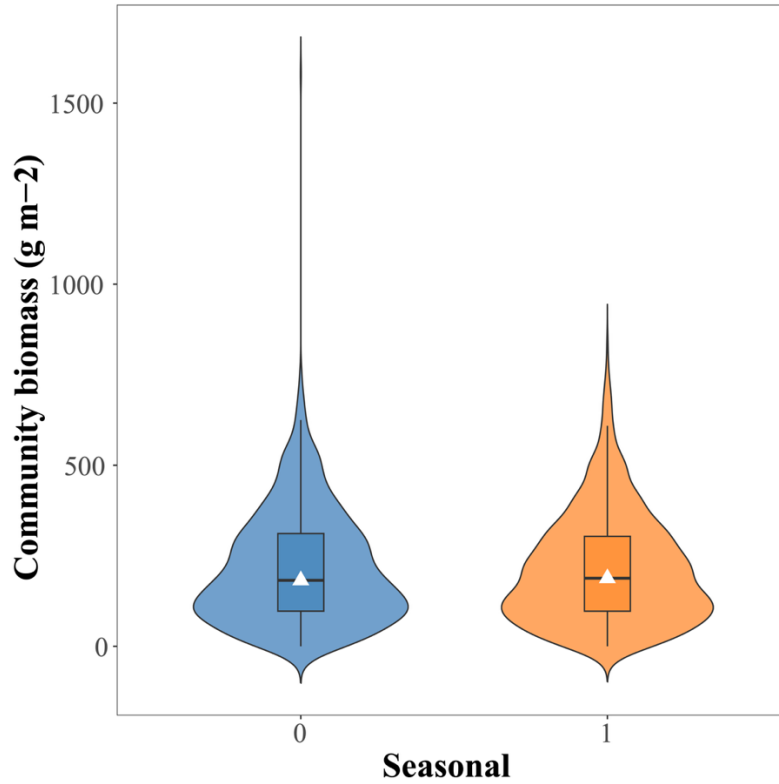

9

10 **Extended Data Figure 2 | Community biomass (g m<sup>-2</sup>) under different Seasonality**  
11 **precipitation treatments, illustrating the effects of seasonality precipitation treatment on**  
12 **biomass production. Sample size (N) equals to 2430.**

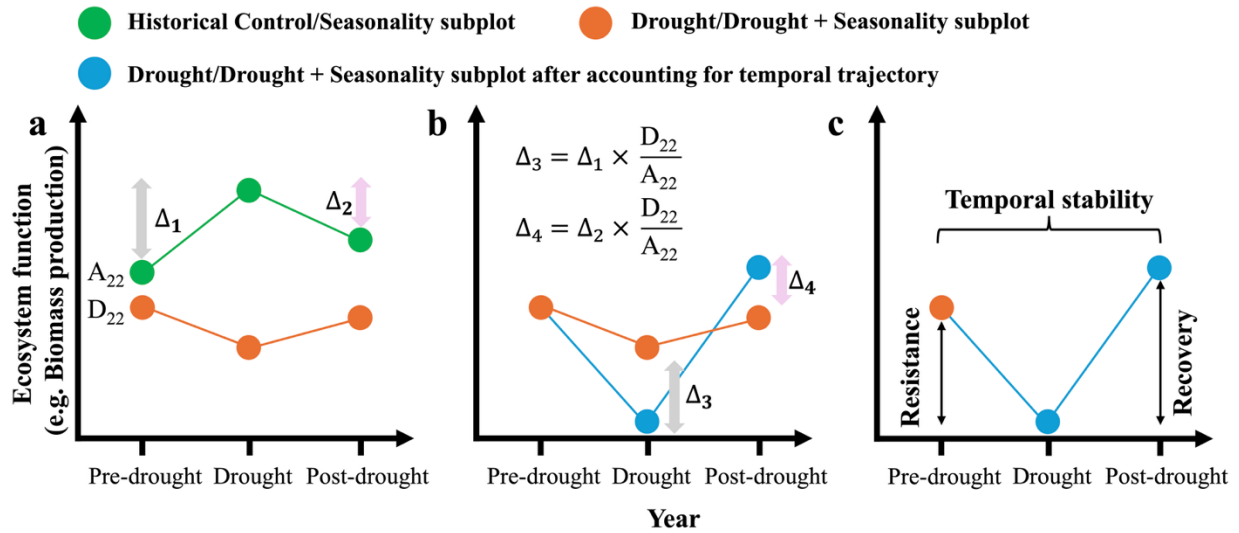

13

14 **Extended Data Figure 3 | Conceptual framework for calculating ecosystem stability after**  
 15 **accounting for natural interannual variation. (a)** how ecosystem function (e.g., biomass  
 16 production) fluctuates over time under historical control/Seasonality conditions, **(b)** how the  
 17 design separates the effects of drought from interannual variability, and **(c)** the three dimensions  
 18 of ecological stability examined in this study. Under Historical control/Seasonality conditions,  
 19 ecosystem function exhibits natural year-to-year fluctuations. Under Drought/Drought +  
 20 Seasonality, ecosystem function is expected to vary proportionally across years relative to the  
 21 ambient pattern.

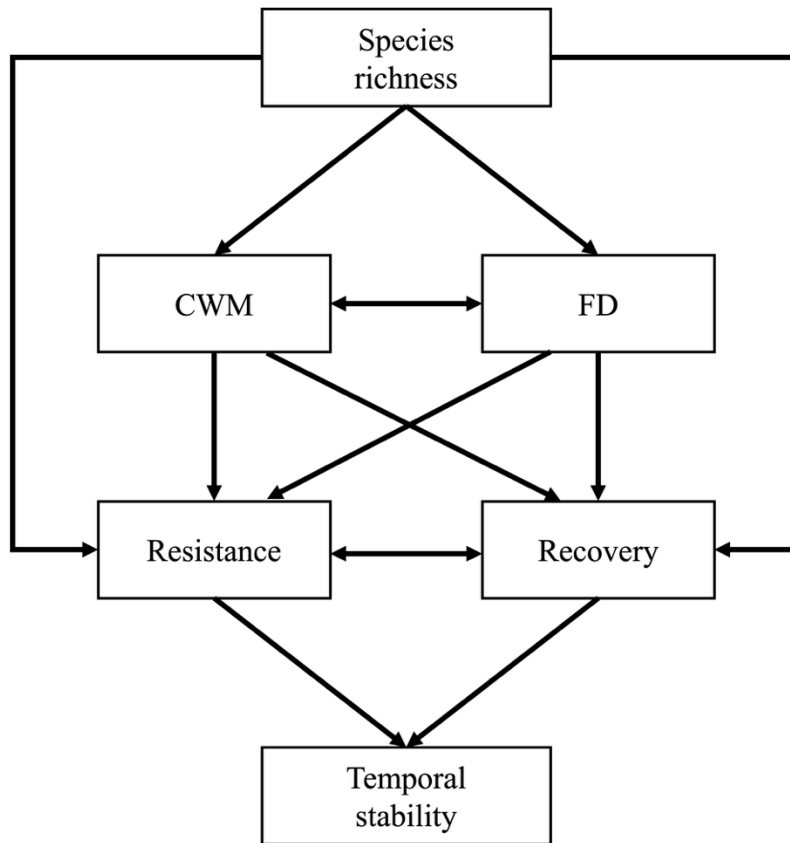

22

23 **Extended Data Figure 4 | Hypothesized causal model linking biodiversity, functional traits**  
 24 **and ecosystem stability.** Conceptual diagram illustrating the predicted direct and indirect effects  
 25 of species richness, community-weighted mean (CWM) traits, and functional diversity (FD) on  
 26 resistance, recovery and ultimately temporal stability, based on existing literature and our a priori  
 27 hypotheses.

28 **EXTENDED DATA TABLES**

29 **Extended Data Table 1. Summary of hypotheses relating biodiversity to three dimensions of ecosystem stability.** “Conservative”  
 30 indicates expectations for communities composed of more conservative species.

31

| <b>Biodiversity</b>                  | <b>Ecosystem stability</b> | <b>Hypothesized effect</b> | <b>Ecological Rationale</b>                                                                                                                                                                                                                                                                  |
|--------------------------------------|----------------------------|----------------------------|----------------------------------------------------------------------------------------------------------------------------------------------------------------------------------------------------------------------------------------------------------------------------------------------|
| Species richness                     | Temporal stability         | (+)                        | More diverse communities have a higher chance of including a species that will increase its performance and compensate for other species in response to perturbation <sup>35</sup> .                                                                                                         |
|                                      | Resistance                 | (+)                        |                                                                                                                                                                                                                                                                                              |
|                                      | Recovery                   | (+)                        |                                                                                                                                                                                                                                                                                              |
| Community-weighted mean traits (CWM) | Temporal stability         | Conservative (+)           | Conservative species are characterized by low relative growth rates, conservative resource acquisition and processing, and long lifespans. These traits enable them to better withstand environmental fluctuations, but may also constrain their capacity for rapid regrowth <sup>25</sup> . |
|                                      | Resistance                 | Conservative (+)           |                                                                                                                                                                                                                                                                                              |
|                                      | Recovery                   | Conservative (-)           |                                                                                                                                                                                                                                                                                              |
| Functional diversity (FD)            | Temporal stability         | (+)                        | Greater trait dissimilarity among species within a community increases the likelihood that species will respond asynchronously to environmental fluctuations <sup>29</sup> .                                                                                                                 |
|                                      | Resistance                 | (+)                        |                                                                                                                                                                                                                                                                                              |
|                                      | Recovery                   | (+)                        |                                                                                                                                                                                                                                                                                              |

32

33 **Extended Data Table 2. Variance structures selected for each bivariate relationship between**  
 34 **biodiversity and ecosystem stability, based on *AICc* comparisons and likelihood-ratio ( $\chi^2$ )**  
 35 **tests.**

36

| <b>Biodiversity</b> | <b>Stability</b>   | <b>Variance Structure</b> |
|---------------------|--------------------|---------------------------|
|                     | Resistance         | NULL                      |
| Species richness    | Recovery           | varPower                  |
|                     | Temporal stability | NULL                      |
|                     | Resistance         | varPower                  |
| CWM-SLA             | Recovery           | varExp                    |
|                     | Temporal stability | varConstPower             |
|                     | Resistance         | varPower                  |
| CWM-LDMC            | Recovery           | NULL                      |
|                     | Temporal stability | varPower                  |
|                     | Resistance         | NULL                      |
| FD-SLA              | Recovery           | NULL                      |
|                     | Temporal stability | NULL                      |
|                     | Resistance         | NULL                      |
| FD-LDMC             | Recovery           | NULL                      |
|                     | Temporal stability | NULL                      |

37

38 **Extended Data Table 3. Variance structures selected for each bivariate relationship between**  
39 **different dimensions of ecosystem stability, based on *AICc* comparisons and likelihood-**  
40 **ratio ( $\chi^2$ ) tests.**

41

| <b>Stability dimension 1</b> | <b>Stability dimension 2</b> | <b>Variance Structure</b> |
|------------------------------|------------------------------|---------------------------|
| Temporal stability           | Resistance                   | varConstPower             |
| Temporal stability           | Recovery                     | varPower                  |
| Resistance                   | Recovery                     | NULL                      |

42
